# Supplementary figures and images for: The Champions League - Improving the quality of in-patient antibiotic prescription in Trauma and Orthopaedics
Source: PubMed Central journal article supplement — BMJ Qual Improv Rep. 2014 Mar 25;3(1):u201983.w1831. doi: 10.1136/bmjquality.u201983.w1831 (PMC4645804; doi:10.1136/bmjquality.u201983.w1831), 2014-03-25

Stop or review date correctly documented

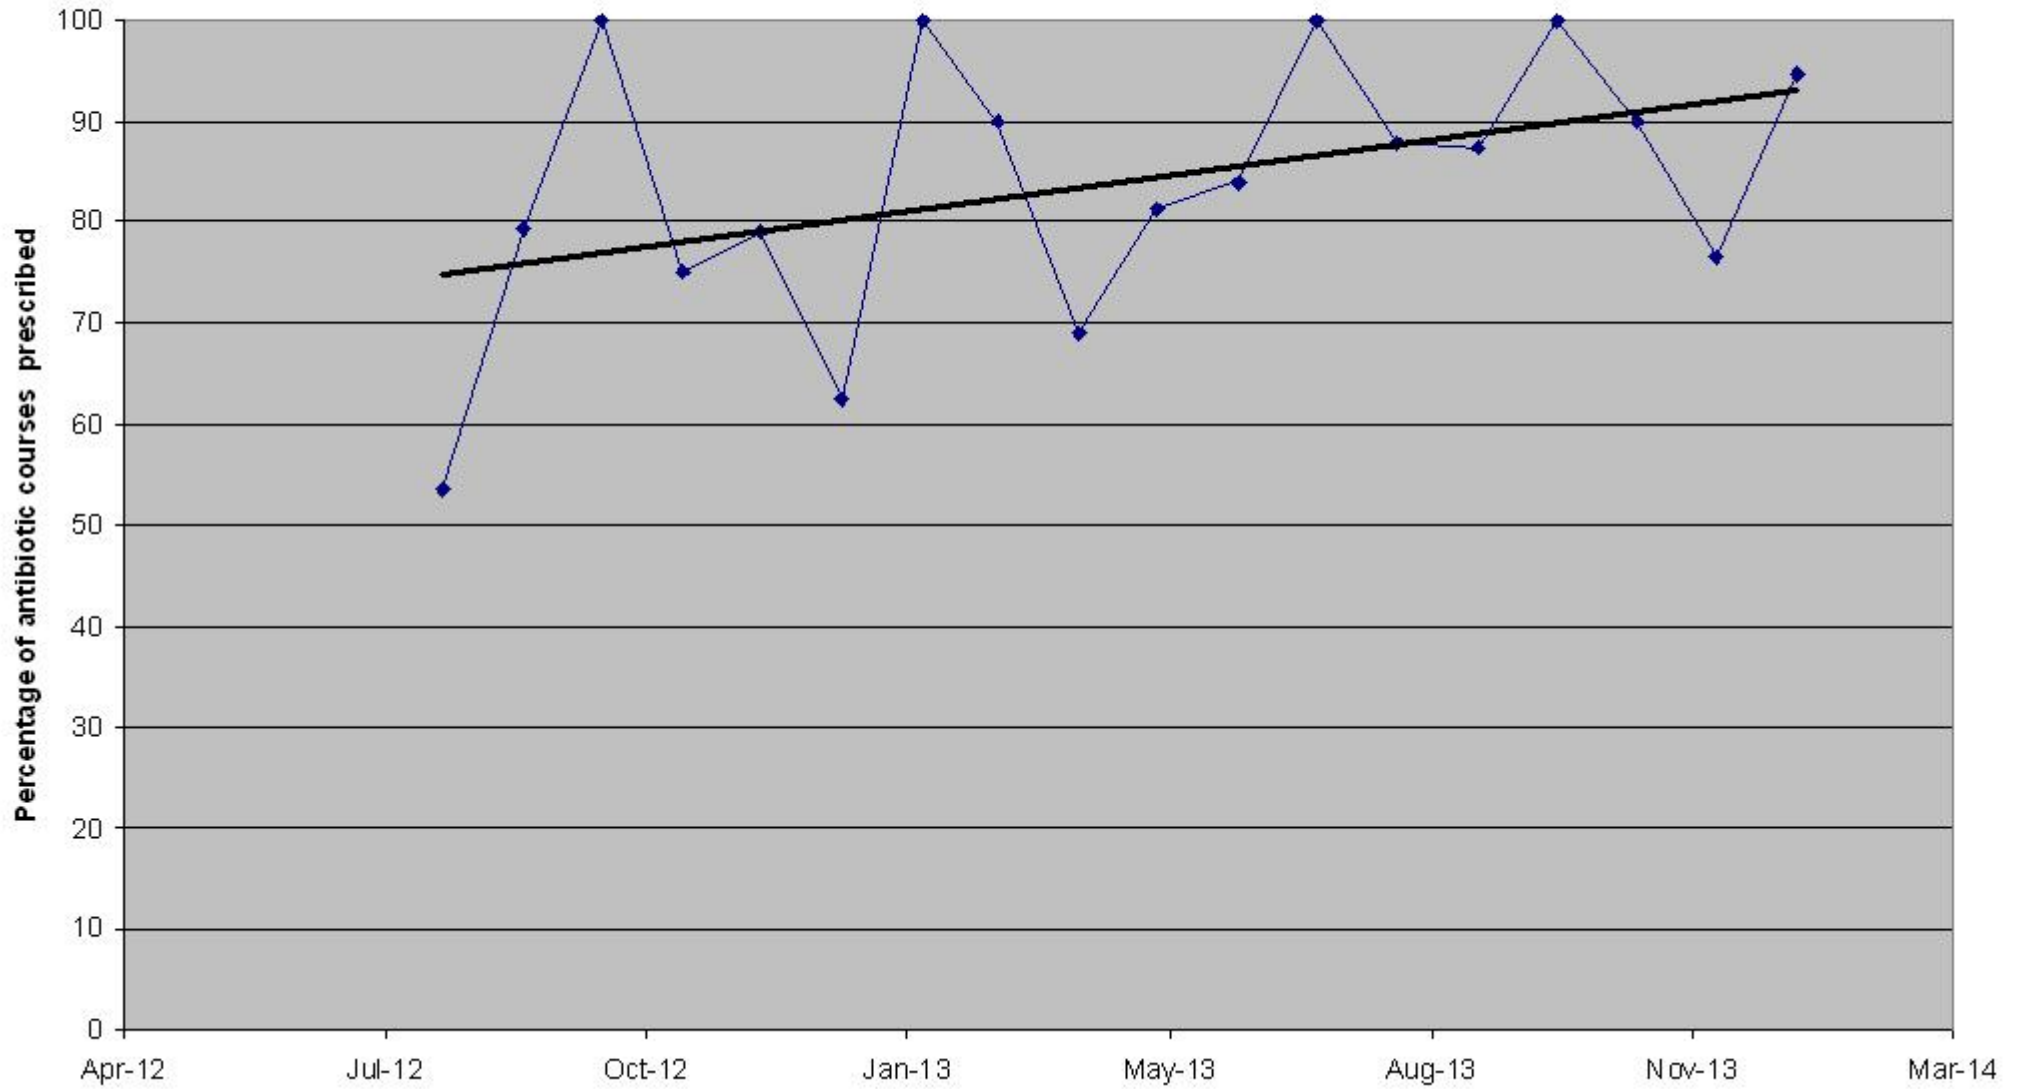

Correct documentation of indication

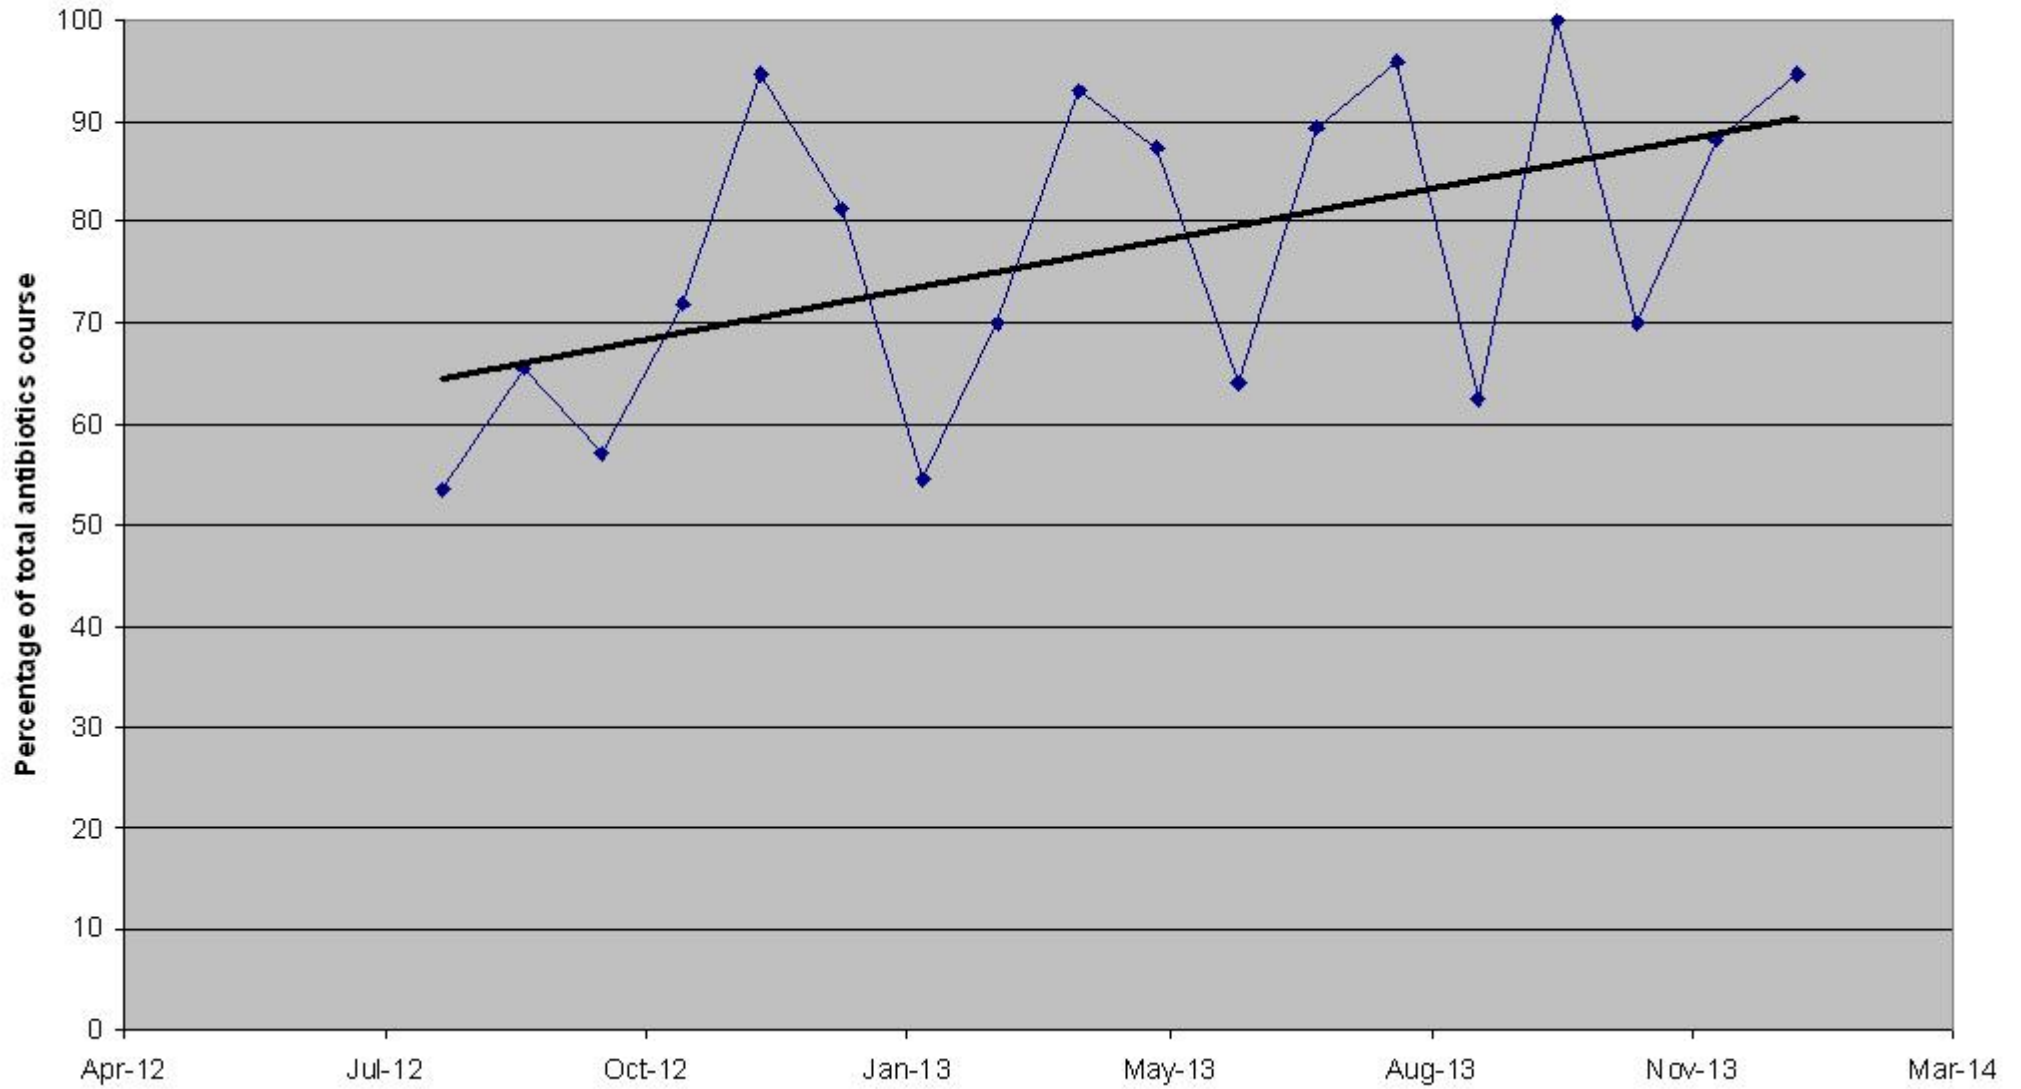

Supplement: bmjqir-3-u201983-w1831-s1.pdf [file bmjqir-3-u201983-w1831-s1.pdf]
